# Supplementary material for: Screening and characterization of vaginal fluid donations for vaginal microbiota transplantation
Source: PubMed Central journal article supplement (PMC9606370; doi:10.1038/s41598-022-22873-y), 2022-10-26
Supplement: 41598_2022_22873_MOESM1_ESM.pdf [file 41598_2022_22873_MOESM1_ESM.pdf]

Supplementary Information

**Screening and Characterization of Vaginal Fluid Donations for Vaginal Microbiota  
Transplantation**

Laura J. Yockey & Fatima Aysha Hussain, et al.

Corresponding author: Caroline M. Mitchell ([caroline.mitchell@mgh.harvard.edu](mailto:caroline.mitchell@mgh.harvard.edu))

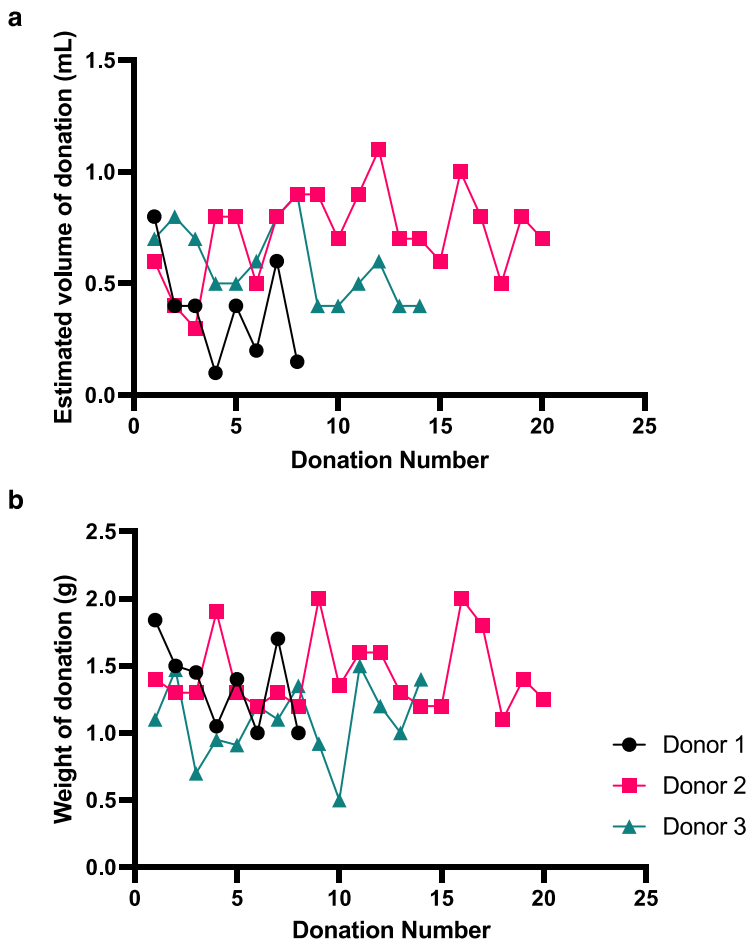

**Figure S1:** Volume (a) and weight (b) of donated vaginal fluid varied donation to donation and donor to donor.

**Table S1: Screening lab acceptable values**

| Measurement          | Reference range   |
|----------------------|-------------------|
| White Blood Count    | 4.5-11K/ $\mu$ L  |
| Hematocrit           | 36-46%            |
| Hemoglobin           | 12-16 g/dL        |
| Platelets            | 150-400K/ $\mu$ L |
| Hemoglobin A1C       | 4.3-6.4%          |
| Sodium               | 135-145 mmol/L    |
| Potassium            | 3.4-5.0 mmol/L    |
| Chloride             | 98-108 mmol/L     |
| CO <sub>2</sub>      | 23-32 mmol/L      |
| BUN                  | 8-25 mg/dL        |
| Creatinine           | 0.6-1.5 mg/dL     |
| AST                  | 9-32 U/L          |
| ALT                  | 7-33 U/L          |
| Alkaline phosphatase | 30-100 U/L        |
| Total bilirubin      | 0-1 mg/dL         |
| Direct bilirubin     | 0-0.4 mg/dL       |

**Table S2: Donor Demographics**

| Donor Number | Age (years) | Race/ethnicity               | BMI  |
|--------------|-------------|------------------------------|------|
| Pilot        | 36          | White/Not Hispanic or Latino | 34.5 |
| 1            | 28          | White/Not Hispanic or Latino | 23.3 |
| 2            | 25          | White/Not Hispanic or Latino | 23.1 |
| 3            | 32          | White/Not Hispanic or Latino | 20.7 |

**Table S3: Quantitative PCR conditions**

| Assay                                                                    | Primer and probe sequences                                                                                  | PCR conditions                                                                       | Per 20uL reaction                                                                       |
|--------------------------------------------------------------------------|-------------------------------------------------------------------------------------------------------------|--------------------------------------------------------------------------------------|-----------------------------------------------------------------------------------------|
| L. crispatus                                                             | 989F TCTTGACATCTAGTGCCATTTGT<br>1055R TGCACCACCTGTCTTAGC<br>FAM-TAMRA<br>CCGAAGGGAACTTTGTAGCGCGAC           | 50C x 2 min<br>95C x 10 min<br><br>45 cycles:<br>95C x 15s<br>65C x 39s<br>72C x 20s | Primers 0.8 uM<br>Probe 0.15uM<br>Taq Fast<br>Advanced Master<br>Mix 10uL<br>Sample 5uL |
| L. iners                                                                 | 165F GATGCTAATACCGGATAAAYAACAGAT<br>241R CACCGCAGGTCCATCCAAGA<br>FAM-TAMRA<br>TGCCTATCAACTGTTTAAAAGATGGTTCT | 50C x 2 min<br>95C x 10 min<br><br>45 cycles:<br>95C x 19s<br>55C x 39s<br>72C x 20s | Primers 0.8 uM<br>Probe 0.15uM<br>Taq Fast<br>Advanced Master<br>Mix 10uL<br>Sample 5uL |
| As described in Srinivasan et al. and McClelland et al. <sup>27,28</sup> |                                                                                                             |                                                                                      |                                                                                         |
